# Supplementary material for: Time-resolved grazing-incidence pair distribution functions during deposition by radio-frequency magnetron sputtering
Source: PubMed Central journal article supplement (PMC6400190; doi:10.1107/s2052252519001192), 2019-02-23
Supplement: m-06-00299-sup1.pdf [file m-06-00299-sup1.pdf]

# IUCrJ

**Volume 6 (2019)**

**Supporting information for article:**

**Time-resolved grazing-incidence pair distribution functions during deposition by radio-frequency magnetron sputtering**

**Martin Roelsgaard, Ann-Christin Dippel, Kasper Andersen Borup, Ida Gjerlevsen Nielsen, Nils Lau Nyborg Broge, Jan Torben Röh, Olof Gutowski and Bo Brummerstedt Iversen**

## S1. Instrumentation

A side view and rendered CAD drawings from the front and side are shown in fig. S1. When the vacuum chamber is used offline a glass flange is installed in place of the Kapton window.

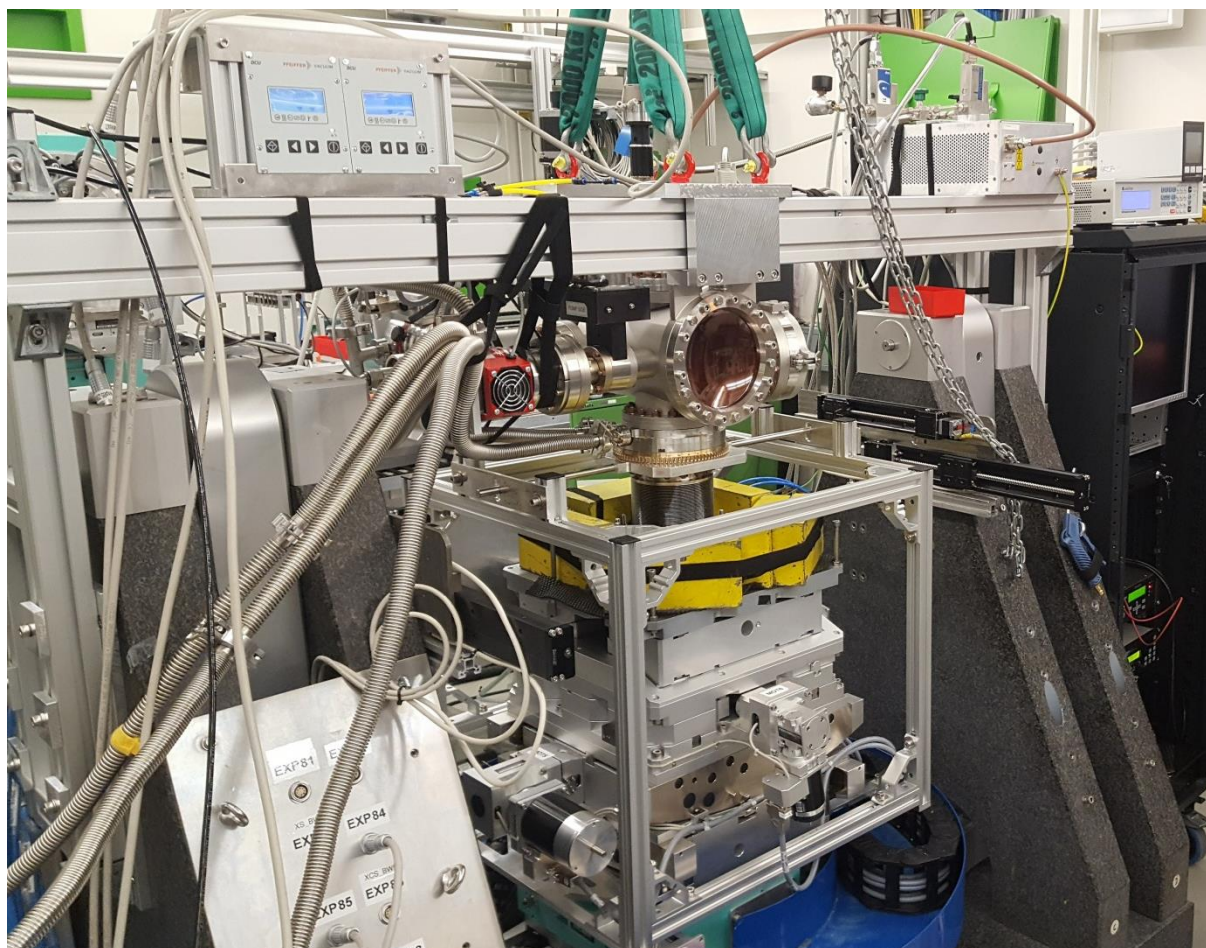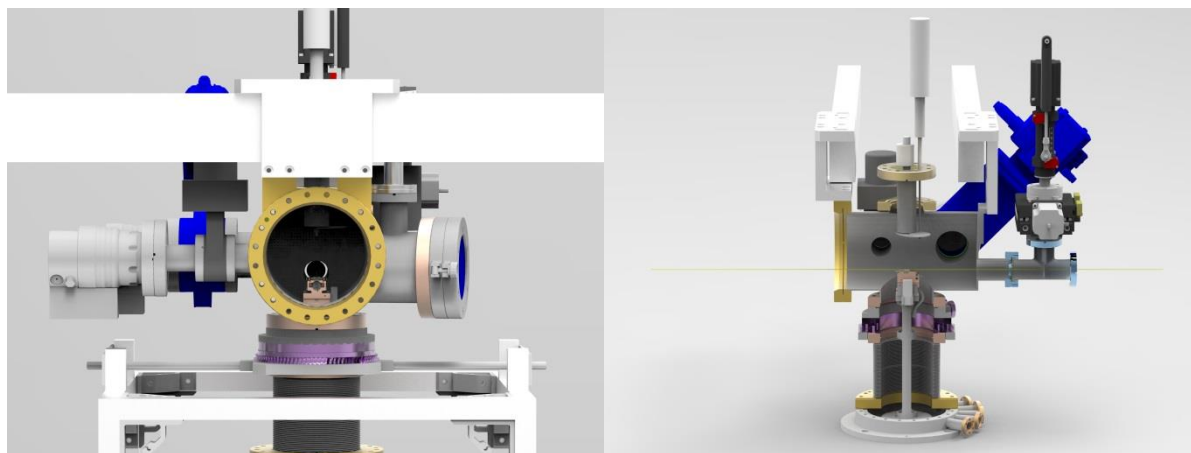

**Figure S1** Picture of the vacuum chamber (top) and CAD renderings from front and side.

## S2. Pole figures

In figure S2 the pole figure of Pt thin film with fiber texture is shown. The measurement was performed on a Rigaku SmartLab system with Co  $K\alpha$  source and parallel beam option with  $0.5 \times 0.1 \text{ mm}^2$  beam size. Pole figures are measured at a fixed  $2\theta$  while varying tilt and in-plane rotation. A ring-like pattern is characteristic of a fiber texture with a fixed orientation of the plane in one direction but random orientation in-plane.

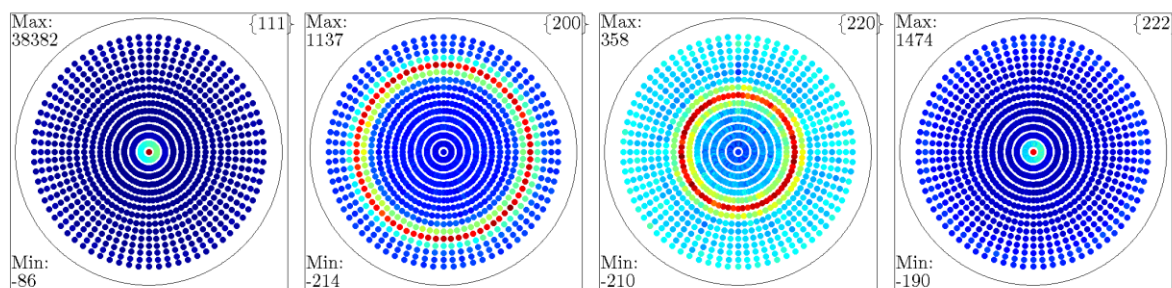

**Figure S2** Pole figures for the (111), (200), (220) and (222) reflections of Pt.

## S3. Background subtraction

The signal/background intensity is correlated to the thickness of the film, requiring the correct ratio between background and film must be identified for each frame to obtain  $S(Q)$  and  $f(Q)$  before Fourier analysis. MCR-ALS was performed with two components assuming non-negativity. The components and their “scale factor” are shown below (solid lines). The MCR-ALS component concentrations were re-scaled to correspond to the average background (between 1 and 0.34) and shown compared to the ratio between substrate structure factor and Pt (111) reflection intensities.

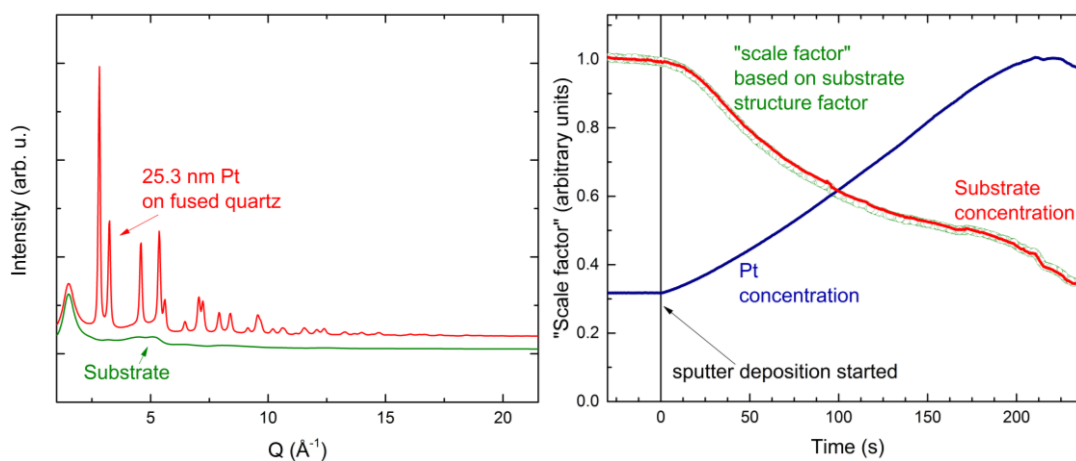

**Figure S3** (a) Substrate signal averaged from frames prior to film deposition. (b) comparison of (111)-reflection to the substrate peak for each point in time during the experiment (green circles) and scaled component concentration as extracted by MCR-ALS.
